44. Perry TE, Muehlschlegel JD, Liu KY, Fox AA, Collard CD, Body SC, Shernan SK; CABG Genomics Investigators: Preoperative C-reactive protein predicts long-term mortality and hospital length of stay after primary, nonemergent coronary artery bypass grafting. *ANESTHESIOLOGY* 2010; 112:607–13
45. Muehlschlegel JD, Liu KY, Perry TE, Fox AA, Collard CD, Shernan SK, Body SC; CABG Genomics Investigators: Chromosome 9p21 variant predicts mortality after coronary artery bypass graft surgery. *Circulation* 2010; 122(11 suppl):S60–5
46. Eckle T, Hartmann K, Bonney S, Reithel S, Mittelbronn M, Walker LA, Lowes BD, Han J, Borchers CH, Buttrick PM, Kominsky DJ, Colgan SP, Eltzschig HK: Adora2b-elicited Per2 stabilization promotes a HIF-dependent metabolic switch crucial for myocardial adaptation to ischemia. *Nat Med* 2012; 18:774–82
47. Wettschureck N, Offermanns S: Mammalian G proteins and their cell type specific functions. *Physiol Rev* 2005; 85:1159–204

## ANESTHESIOLOGY REFLECTIONS FROM THE WOOD LIBRARY-MUSEUM

### The Wachter Chloroform Dropper

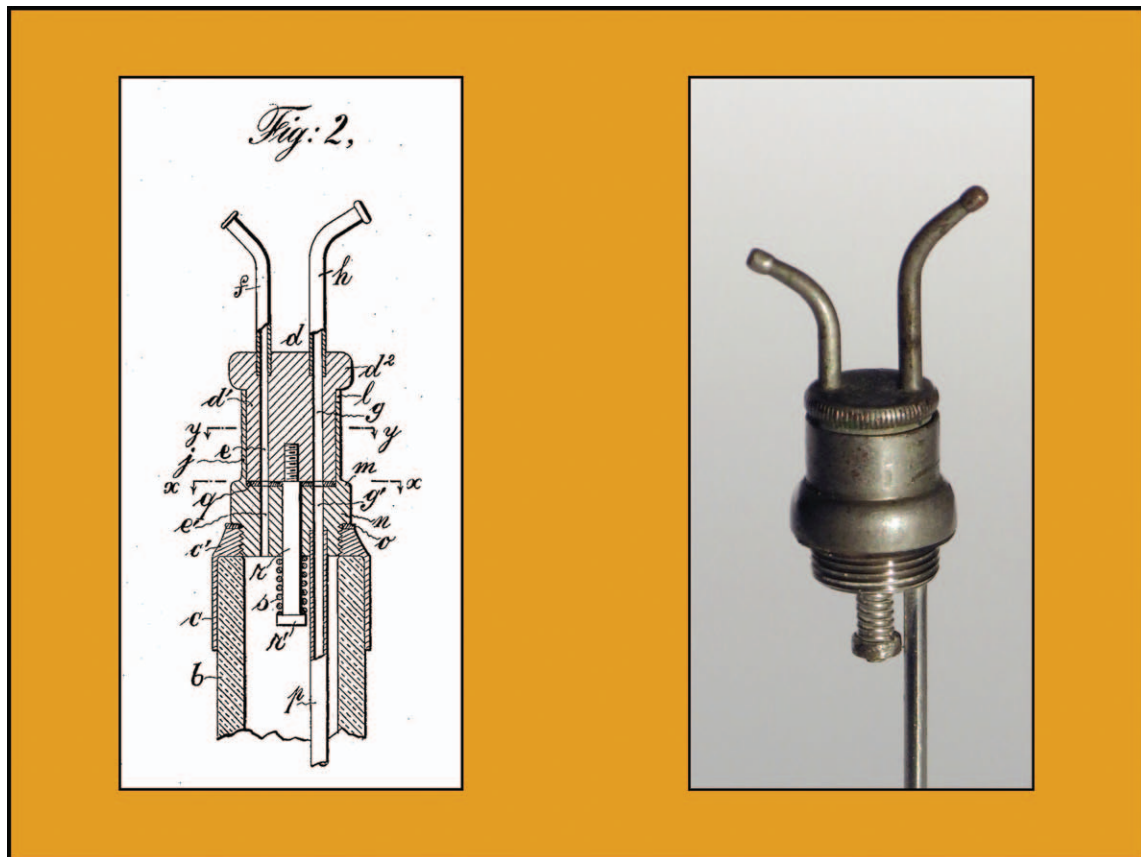

An American citizen residing in Jersey City, New Jersey, Frederick Wachter filed on Columbus Day of 1905 for a U.S. patent on his “Chloroform-Dropper.” On the right side of both images, an air-venting tube *h* extends down through the stopper and deep inside the drop bottle as tube *p*. A central screw turns through 90 degrees from *s*[hut] to *o*[pen]. When fully open, with bent tubes pointed downward, chloroform can pass through the left tubing on both images, from *e* to *f*. Granted on June 12, 1906, [U.S.] “PAT No 823233” was inscribed across the dropper top. One of the few examples of dropper bottle technology not designed in Europe, the Wachter Chloroform Dropper was designed, as Europeans will gleefully note, by a German-American who was born in Baden, Germany. (Copyright © the American Society of Anesthesiologists, Inc.)

George S. Bause, M.D., M.P.H., Honorary Curator, ASA’s Wood Library-Museum of Anesthesiology, Park Ridge, Illinois, and Clinical Associate Professor, Case Western Reserve University, Cleveland, Ohio. UJYC@aol.com.
